# Supplementary material for: Sex differences in the intergenerational link between maternal and neonatal whole blood DNA methylation: a genome-wide analysis in 2 birth cohorts
Source: PubMed Central journal article supplement (PMC10040137; doi:10.1186/s13148-023-01442-8), 2023-03-25

## Supplementary materials

### **Sex Differences in the Intergenerational Link Between Maternal and Neonatal Whole Blood DNA Methylation: A Genome-wide Analysis in 2 Birth Cohorts**

Jie Hu<sup>1,2†</sup>, Xin Xu<sup>2†</sup>, Jun Li<sup>2,3</sup>, Yu Jiang<sup>4</sup>, Xiumei Hong<sup>5</sup>, Kathryn M. Rexrode<sup>1</sup>, Guoying Wang<sup>5</sup>, Frank B. Hu<sup>2,3,6</sup>, Hongmei Zhang<sup>4</sup>, Wilfried J. Karmaus<sup>4</sup>, Xiaobin Wang<sup>5,7</sup>, Liming Liang<sup>2,8</sup>

† These authors contributed equally.

#### **Corresponding author**

Liming Liang, PhD

655 Huntington Avenue, Building 2, Room 207, Boston, MA 02115, USA.

Email: [lliang@hsph.harvard.edu](mailto:lliang@hsph.harvard.edu)

Office: +1 (617) 432-5896

#### **Affiliations**

<sup>1</sup> Division of Women's Health, Department of Medicine, Brigham and Women's Hospital and Harvard Medical School, Boston, MA.

<sup>2</sup> Department of Epidemiology, Harvard T.H. Chan School of Public Health, Boston, MA.

<sup>3</sup> Department of Nutrition, Harvard T.H. Chan School of Public Health, Boston, MA.

<sup>4</sup> Division of Epidemiology, Biostatistics, & Environmental Health, School of Public Health, University of Memphis, Memphis, TN.

<sup>5</sup> Center on the Early Life Origins of Disease, Department of Population, Family and Reproductive Health, Johns Hopkins University Bloomberg School of Public Health, Baltimore, MD.

<sup>6</sup> Channing Division of Network Medicine, Department of Medicine, Brigham and Women's Hospital and Harvard Medical School, Boston, MA.

<sup>7</sup> Department of Pediatrics, Johns Hopkins University School of Medicine, Baltimore, MD.

<sup>8</sup> Department of Biostatistics, Harvard T.H. Chan School of Public Health, Boston, MA.

**Supplementary Figure S1.** Distributions of overall maternal-newborn correlations in DNAm, stratified by newborn sex.

Overall mother-newborn correlations comparing paired maternal-newborn samples (marked as red) and randomly paired maternal-newborn samples (computed from 10 permutation; marked as grey), stratified by A-C) mother-male and B-D) mother-female pairs.

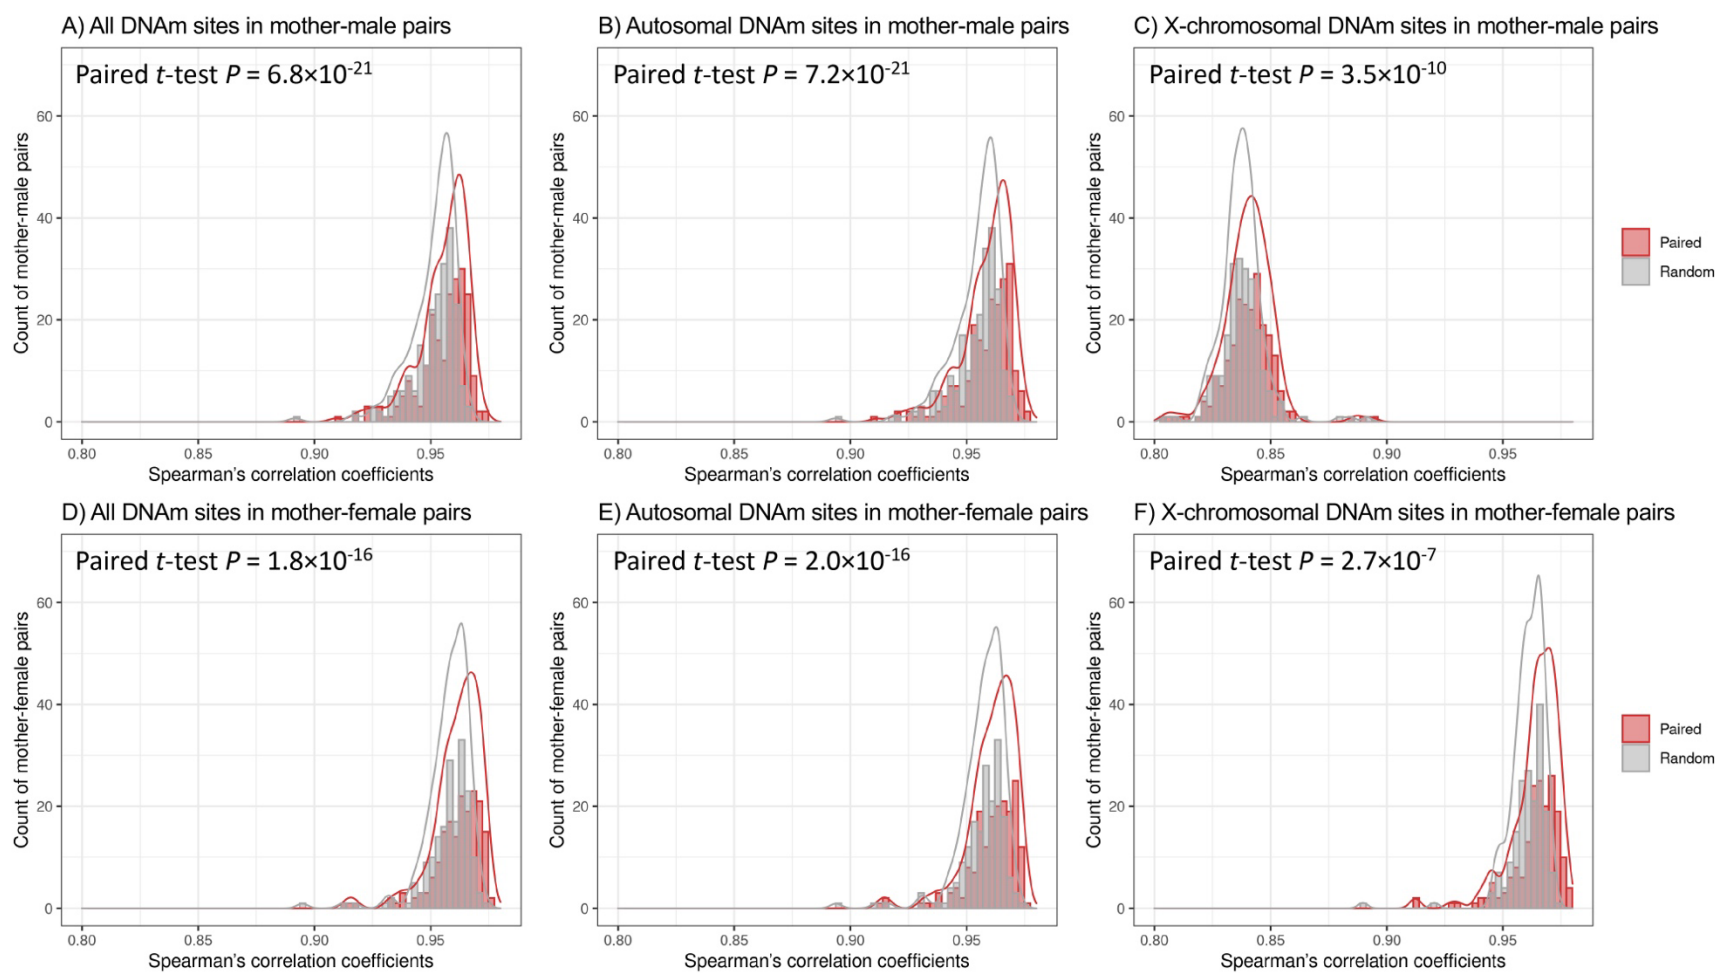

**Supplementary Figure S2.** Distributions of overall maternal-newborn correlations in DNAm by newborn sex in the BBC and IOWBC.

Overall mother-newborn correlations comparing between newborn sex for all, autosomal, and X-chromosomal DNAm sites in A-C) mother-newborn pairs in the BBC, D-F) pre-pregnancy mother-newborn pairs in the IOWBC, and G-I) early-pregnancy mother-newborn pairs in the IOWBC.

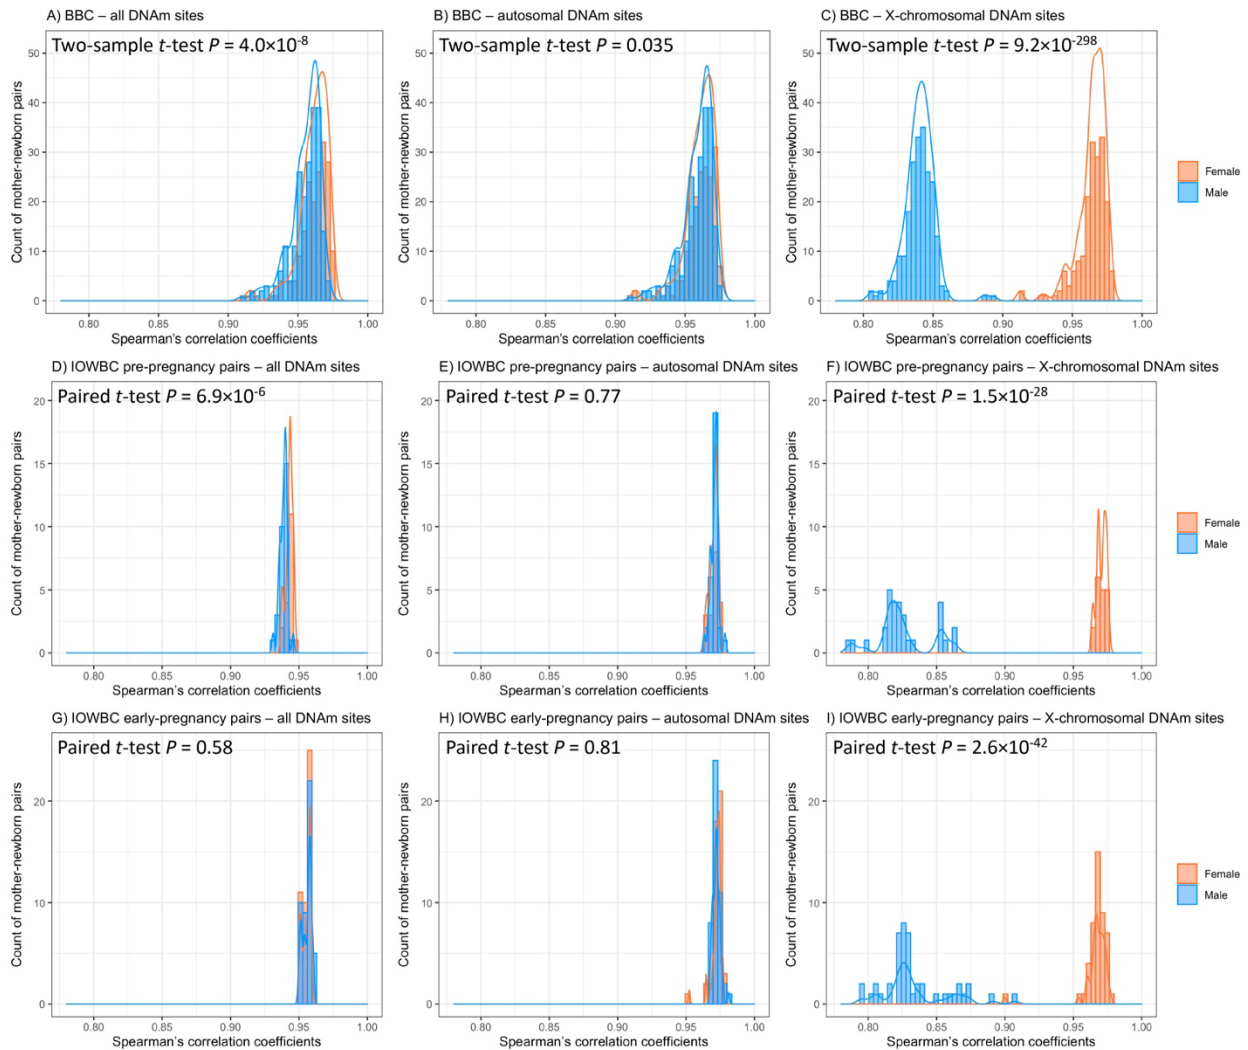

**Supplementary Figure S3.** Distribution of p-values from Likelihood Ratio Test that estimated mother-newborn associations in methylation levels at individual DNAm sites, by the  $h^2$  of each DNAm site.

The X-axis is the heritability ( $h^2$ ) of individual DNAm sites based on a published study on DNAm quantitative trait loci (van Dongen et al. 2016; PMID: 27051996), but only the heritability of autosomal DNAm sites was available. The Y-axis is the  $-\log_{10}(\text{p-values})$  from Likelihood Ratio Test that estimated the associations in methylation levels at individual DNAm sites between mothers and their newborns. The red horizontal lines marks FDR=0.05.

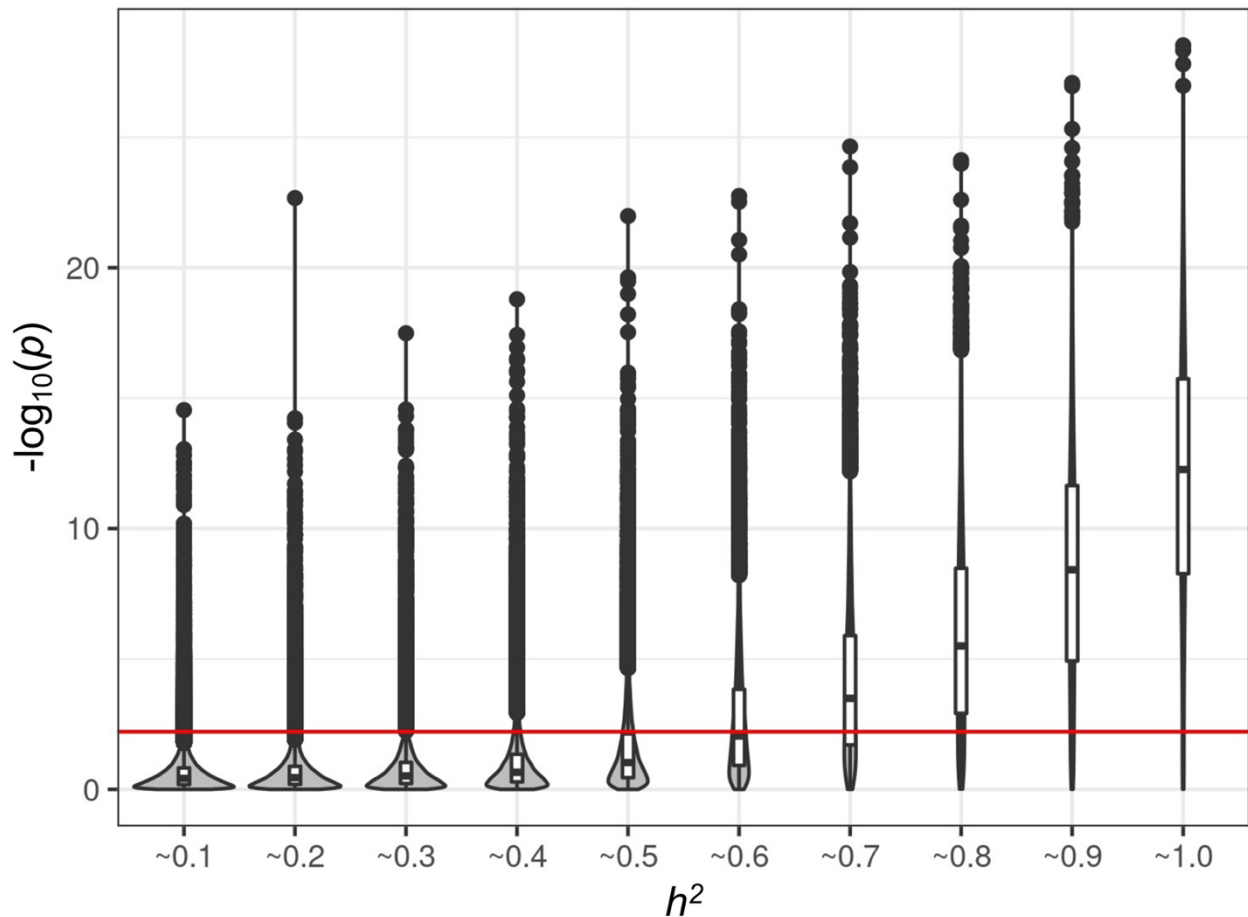

**Supplementary Figure S4.** Numbers of DNAm sites showing significant mother-newborn associations in methylation levels from Likelihood Ratio Test, by the  $h^2$  of each DNAm site.

The X-axis is the heritability ( $h^2$ ) of individual DNAm sites based on a published study on DNAm quantitative trait loci (van Dongen et al. 2016; PMID: 27051996), but only the heritability of autosomal DNAm sites was available. The Y-axis is the numbers of DNAm sites. Blue columns are DNAm sites showing nonsignificant mother-newborn associations ( $FDR \geq 0.05$ ) in Likelihood Ratio Test, and grey columns are DNAm sites showing significant mother-newborn associations ( $FDR < 0.05$ ). The table below showed the numbers for DNAm showing significant or nonsignificant mother-newborn associations in each  $h^2$  category.

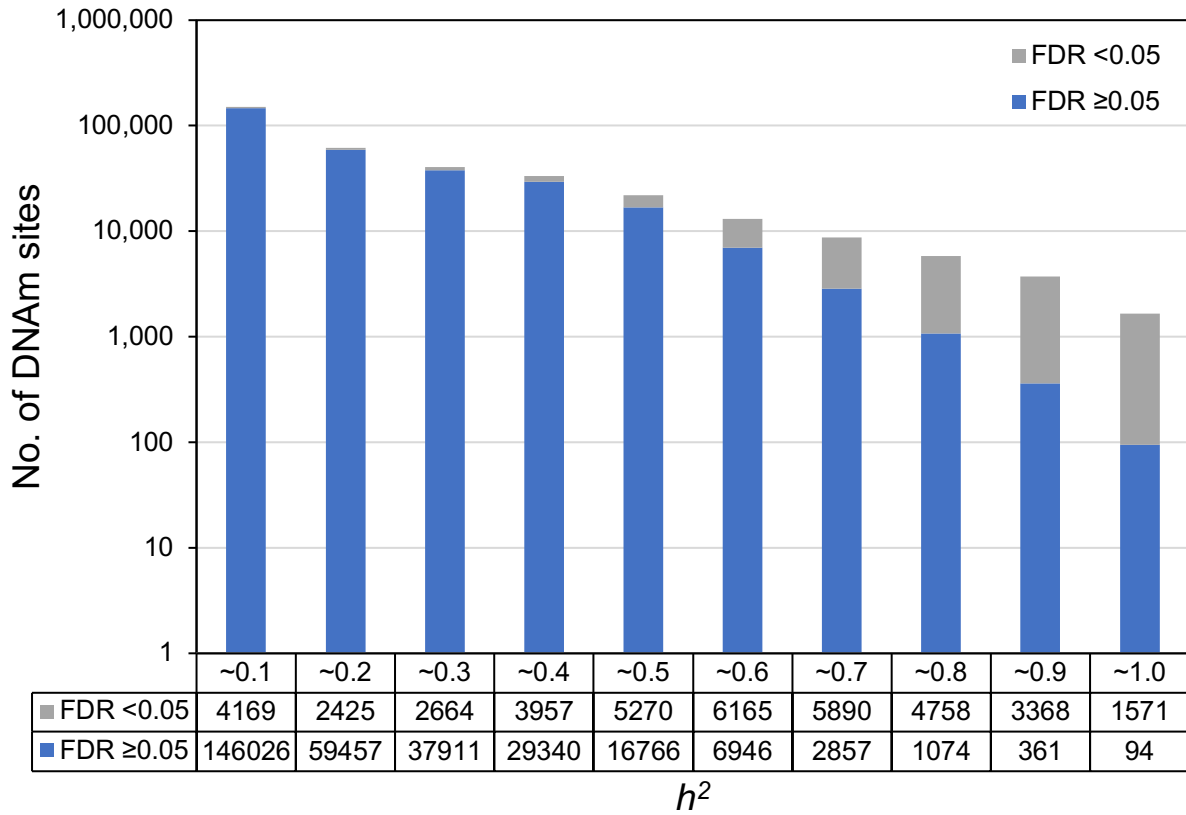

**Supplementary Figure S5.** Concordance of results from the main and sensitivity analyses estimating mother-newborn associations in methylation levels for individual DNAm sites.

Distributions of A) p-values from the Likelihood Ratio Test, B) regression coefficients for the interaction term between maternal methylation levels and newborn sex, and C) p-values for the interaction term between maternal methylation levels and newborn sex from both main and sensitivity analyses were shown. The X-axis represented results for main analysis (i.e., models were adjusted for maternal age at delivery, maternal race/ethnicity, maternal smoking, preterm birth, type of delivery, and surrogate variables). The Y-axis represented results from the sensitivity analysis additionally adjusting for birth order.

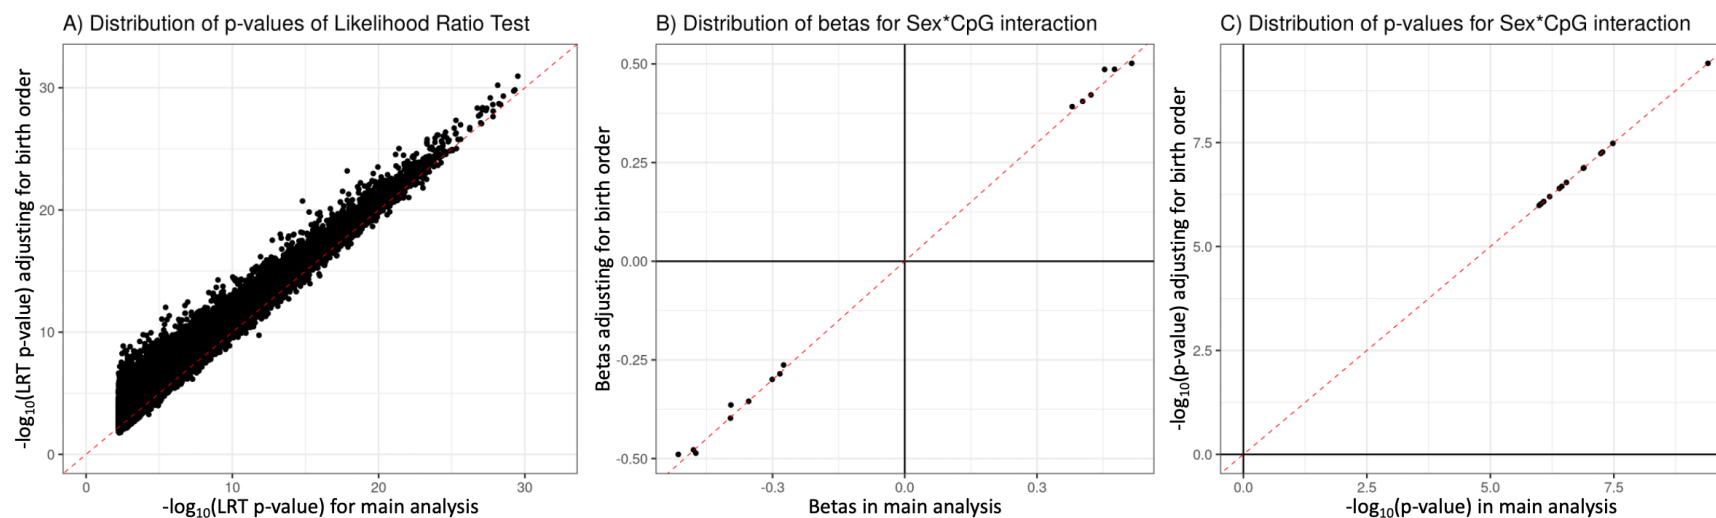

**Supplementary Figure S6.** Distribution of A) p-values and B) regression coefficients for associations between  $\Delta$ DNAm and newborn sex at individual DNAm sites, by the  $h^2$  of each DNAm site.

$\Delta$ DNAm represents differences in maternal-neonatal methylation levels of individual DNAm sites. The X-axis is the heritability ( $h^2$ ) of individual DNAm sites based on a published study on DNAm quantitative trait loci (van Dongen et al. 2016; PMID: 27051996), but only the heritability of autosomal DNAm sites was available. The Y-axis is the A)  $-\log_{10}(\text{p-values})$  and B) regression coefficients (betas) for associations between  $\Delta$ DNAm and newborn sex. The red horizontal lines marks FDR=0.05.

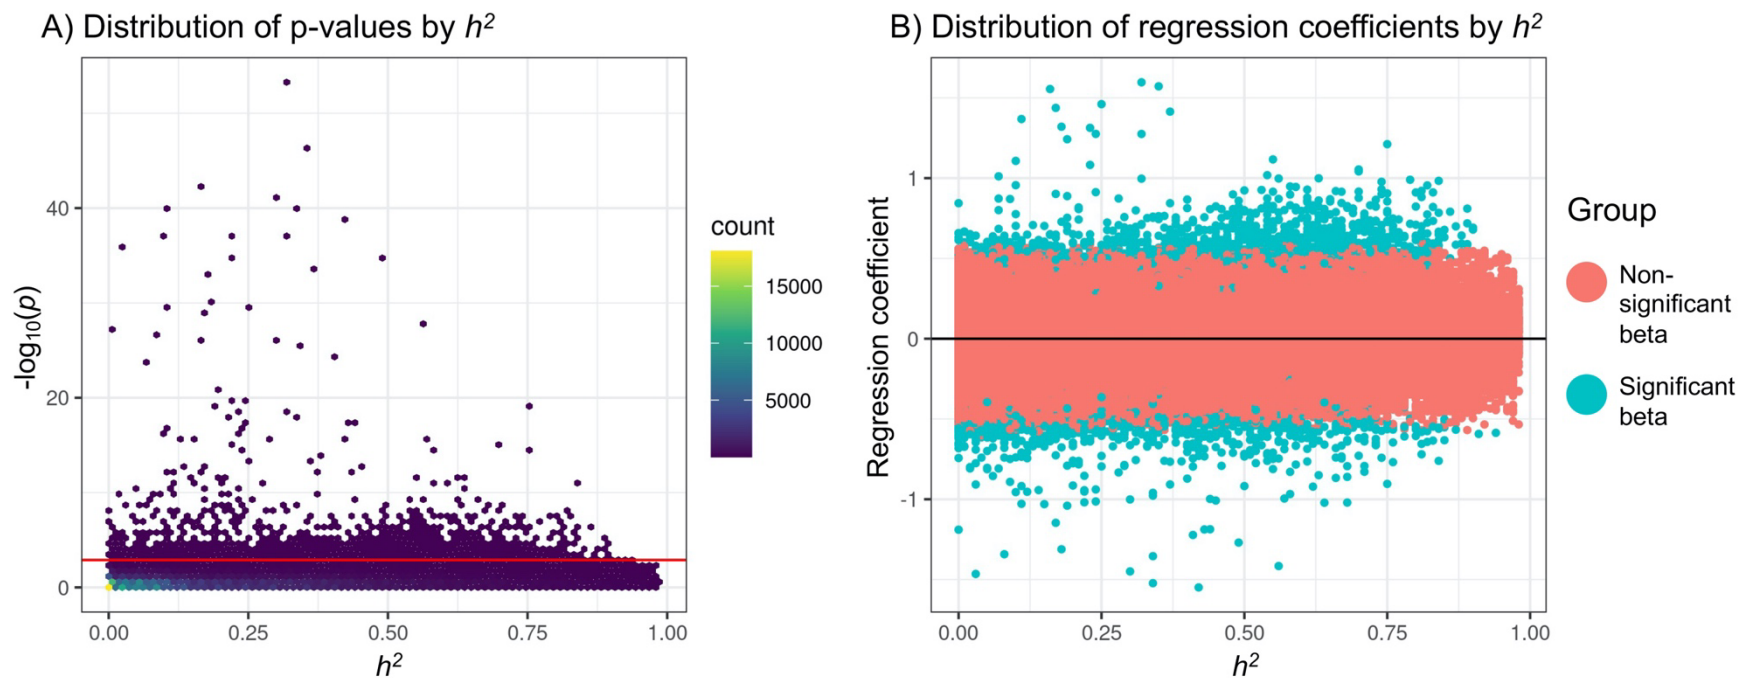

**Supplementary Figure S7.** Concordance of regression coefficients between BBC and IOWBC pre-pregnancy pairs for associations between  $\Delta$ DNAm and newborn sex.

Regression coefficients for associations between  $\Delta$ DNAm and newborn sex were compared between the BBC (primary analysis) and pre-pregnancy pairs from the IOWBC (replication) in A) all available 8,896 DNAm sites, and B) 1,245 DNAm sites showed a  $p < 0.05$  in the IOWBC. P-values for chi-square test for concordance were presented. C) DNAm sites with significant associations between  $\Delta$ DNAm and newborn sex ( $p < 0.05$ ) in the IOWBC were enriched, with a  $p < 2.2 \times 10^{-16}$  in the Kolmogorov-Smirnov Test.

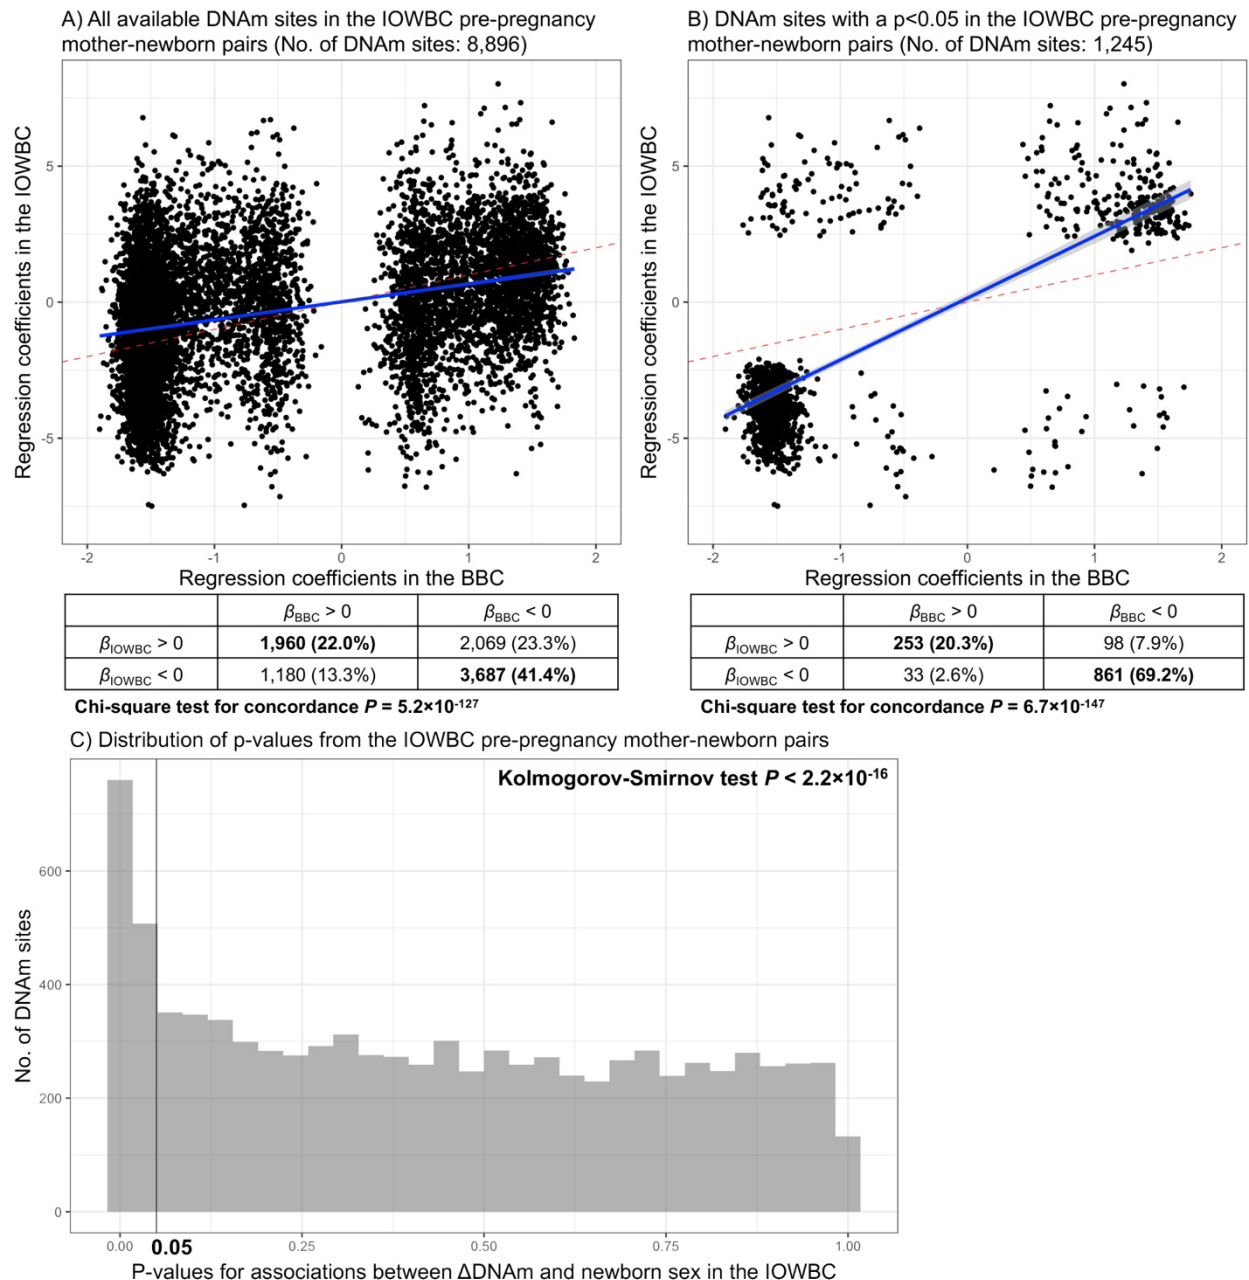



**Supplementary Figure S8.** Concordance of regression coefficients between BBC and IOWBC early-pregnancy pairs for associations between  $\Delta$ DNAm and newborn sex.

Regression coefficients for associations between  $\Delta$ DNAm and newborn sex were compared between the BBC (primary analysis) and early-pregnancy pairs from the IOWBC (replication) in A) all available 9,986 DNAm sites, and B) 1,827 DNAm sites showed a  $p < 0.05$  in the IOWBC. P-values for chi-square test for concordance were presented. C) DNAm sites with significant associations between  $\Delta$ DNAm and newborn sex ( $p < 0.05$ ) in the IOWBC were enriched, with a  $p < 2.2 \times 10^{-16}$  in the Kolmogorov-Smirnov Test.

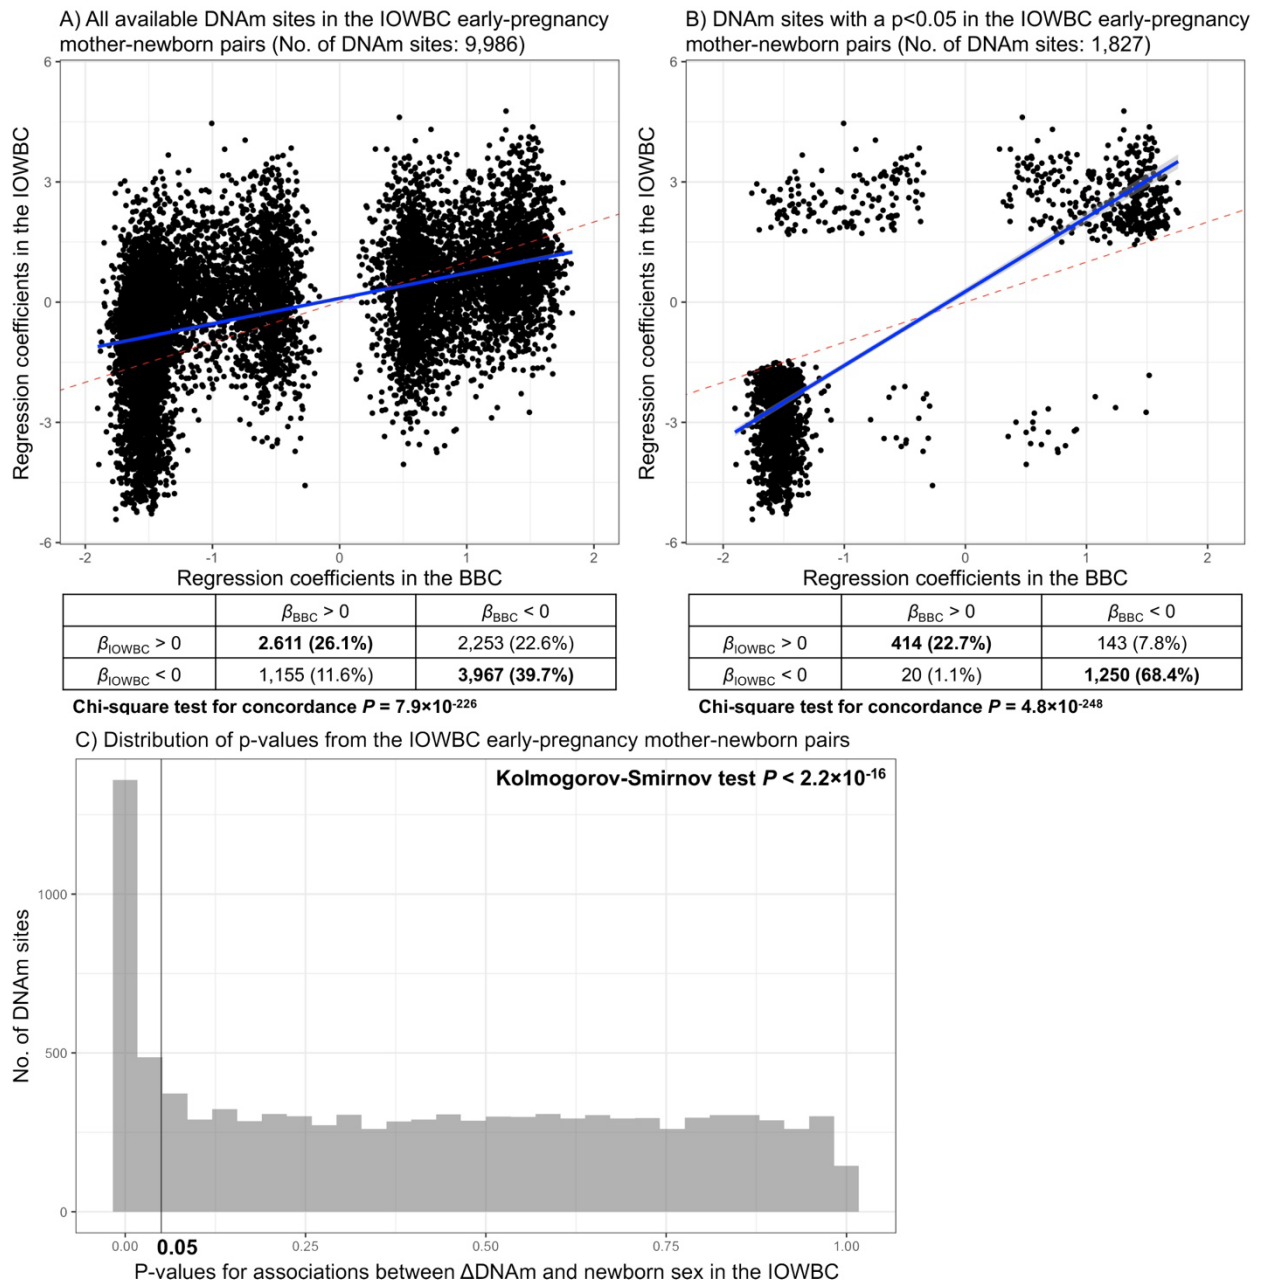

**Supplementary Figure S9.** Flow chart for analysis steps in the Boston Birth Cohort (BBC).

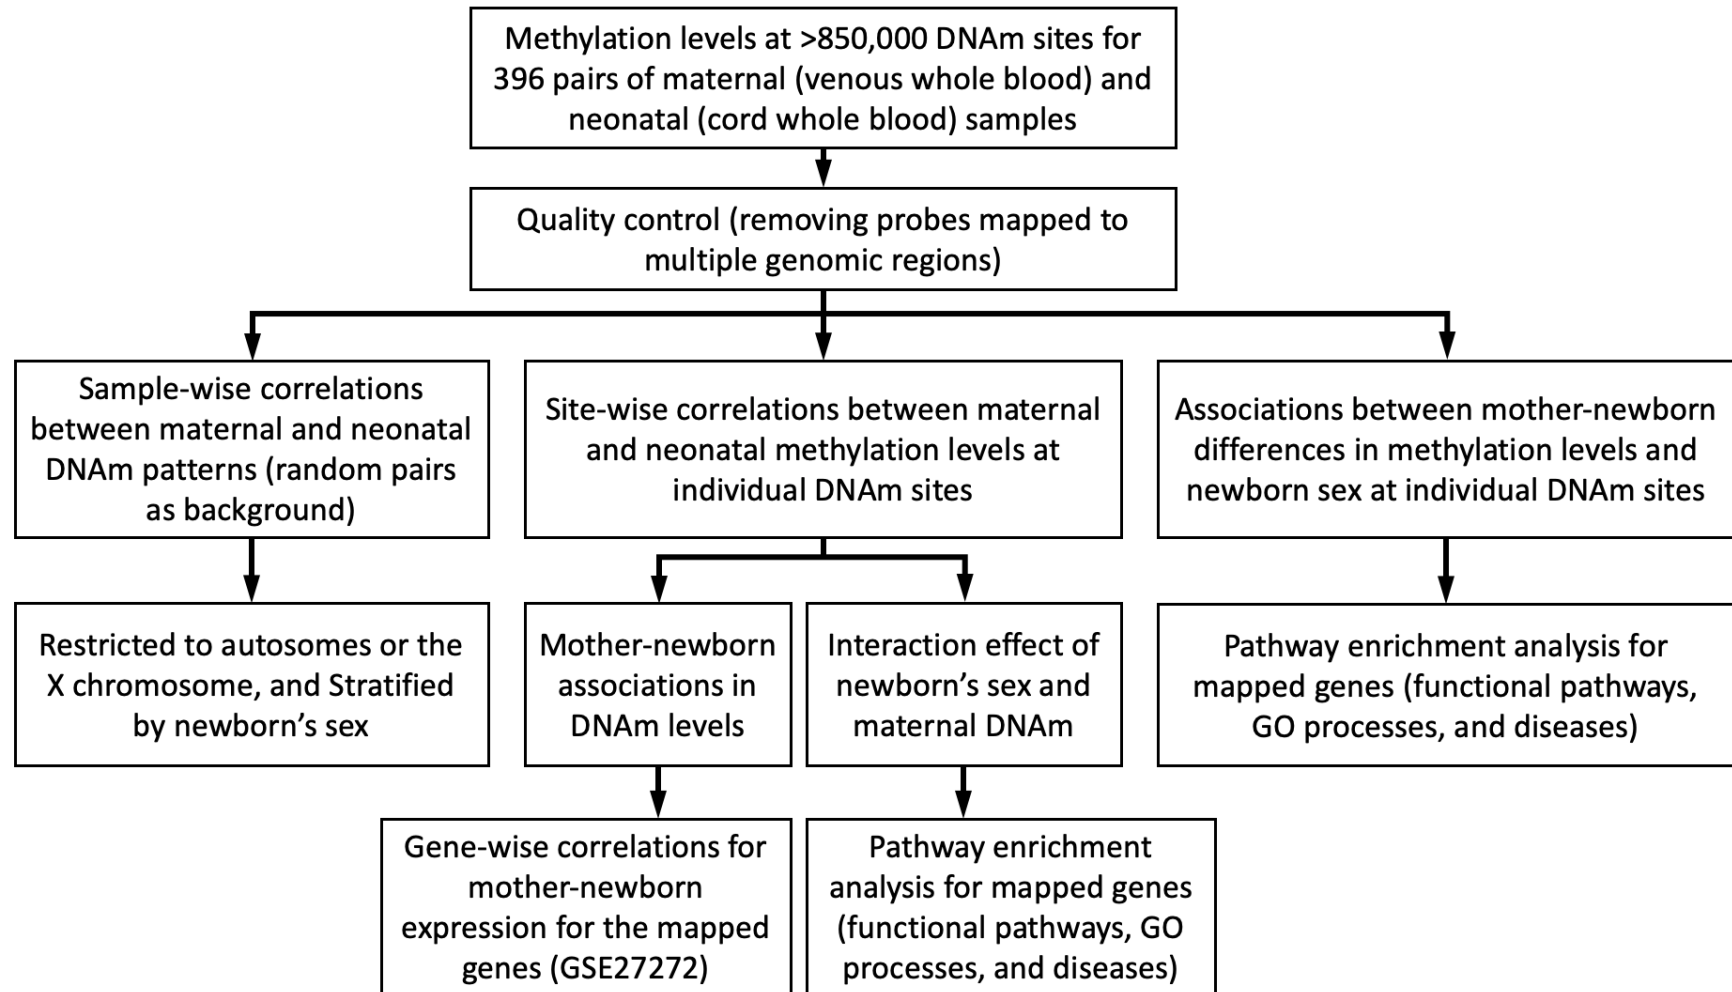

Supplement: 13148_2023_1442_MOESM1_ESM.pdf [file 13148_2023_1442_MOESM1_ESM.pdf]
